# Supplementary material
Source: PubMed Central journal article supplement (PMC6859074)
Supplement: EMS84317-supplement-1.pdf [file EMS84317-supplement-1.pdf]

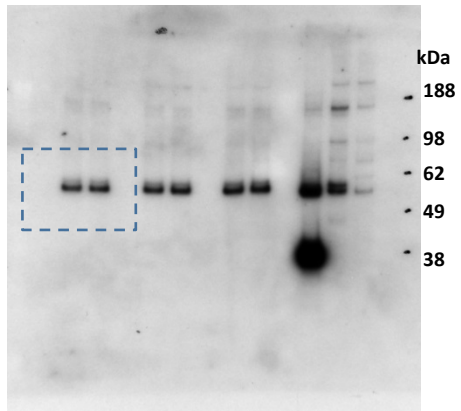

**Figure 4d**

Anti-Strep Western blot

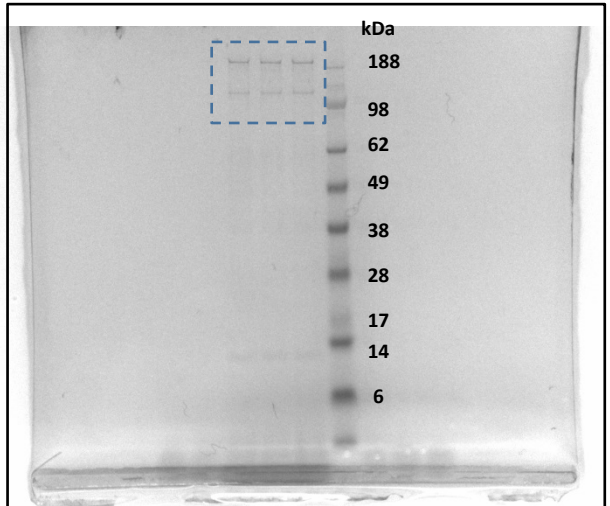

**Figure 4e**

SDS PAGE protein Coomassie blue staining

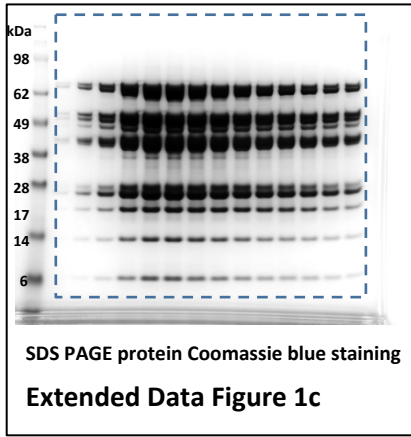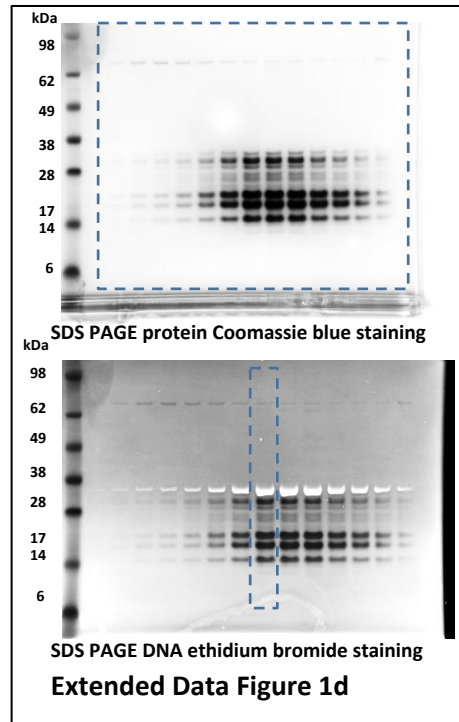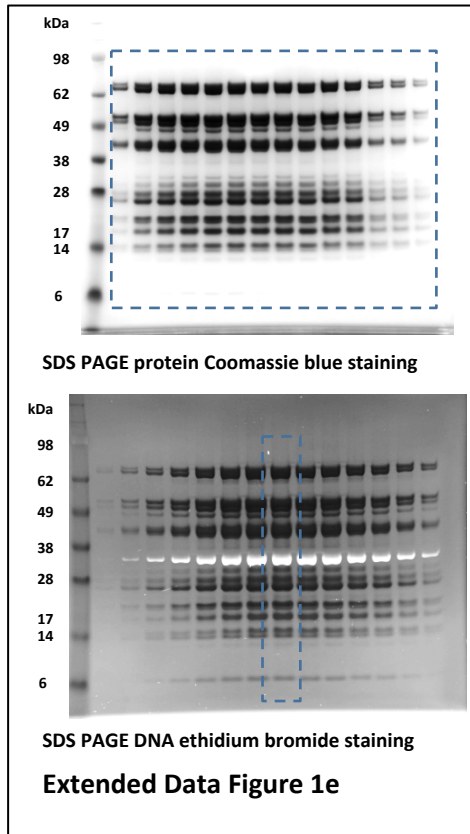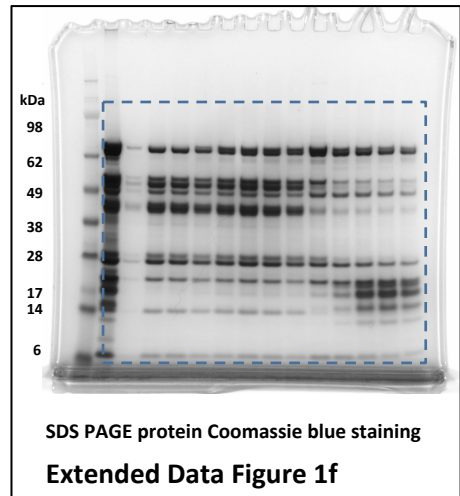

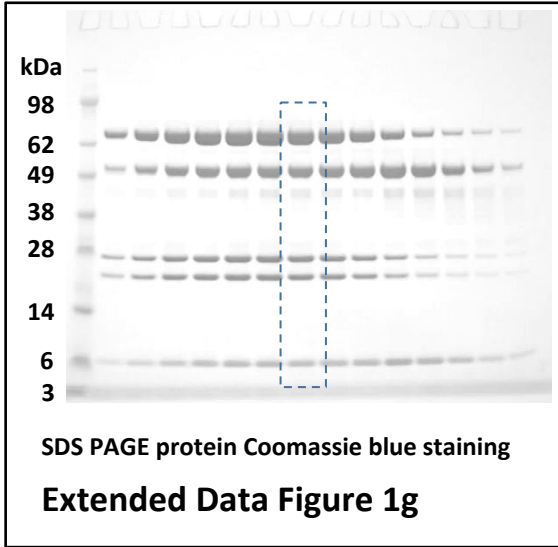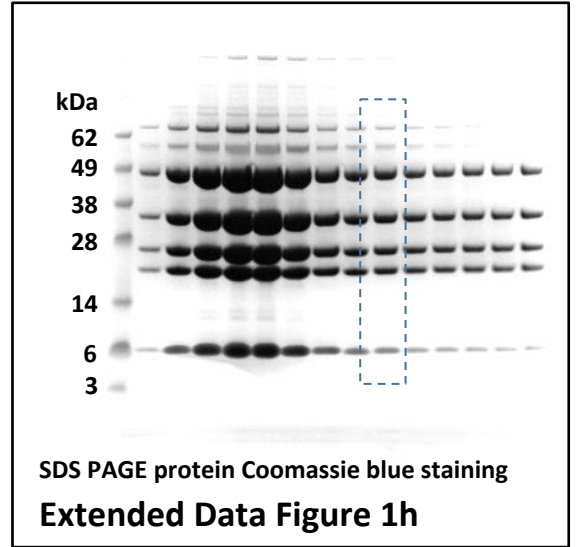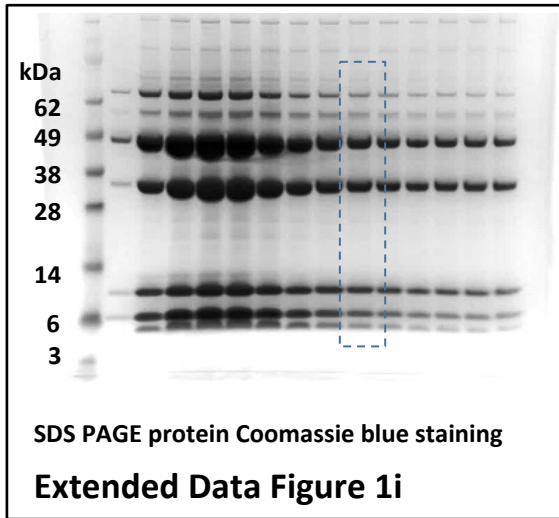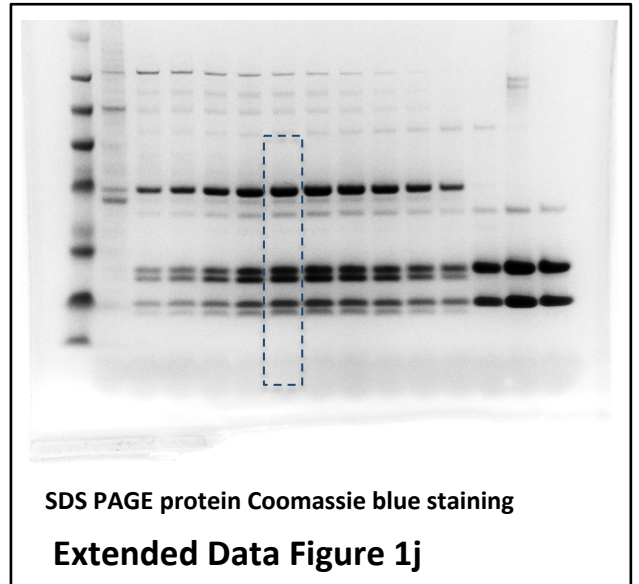

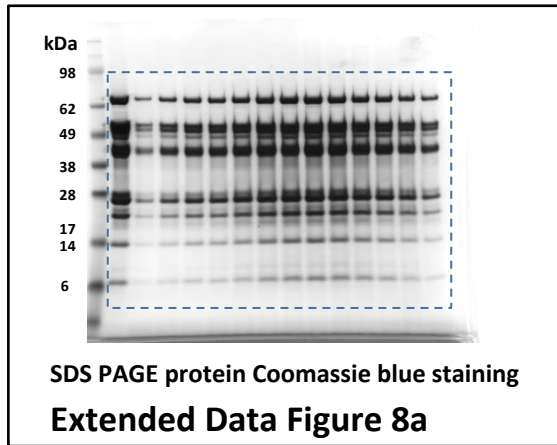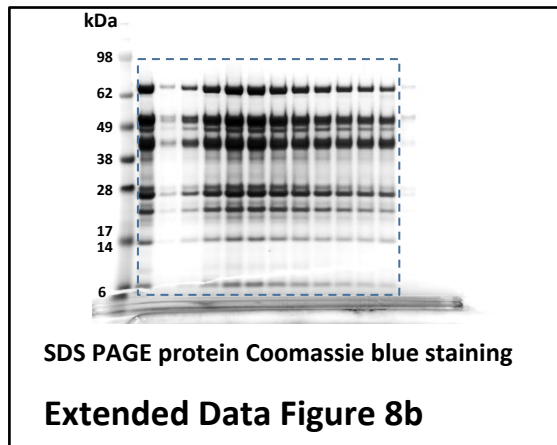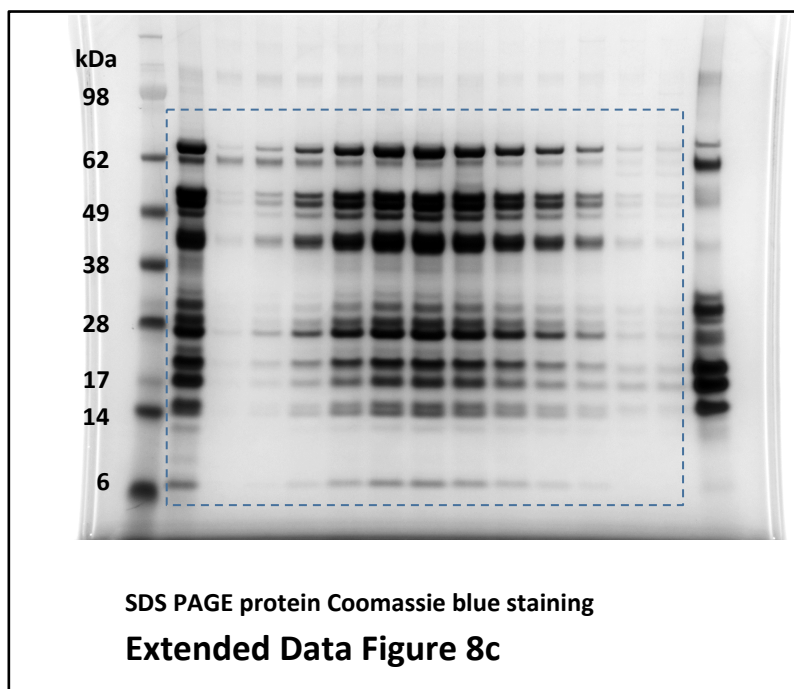



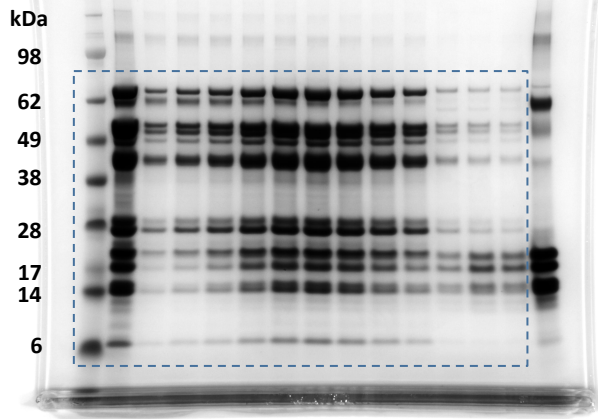

**Extended Data Figure 8d**

SDS PAGE Coomassie blue staining

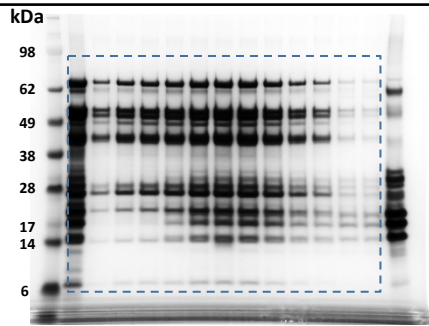

**Extended Data Figure 8e**

SDS PAGE Coomassie blue staining

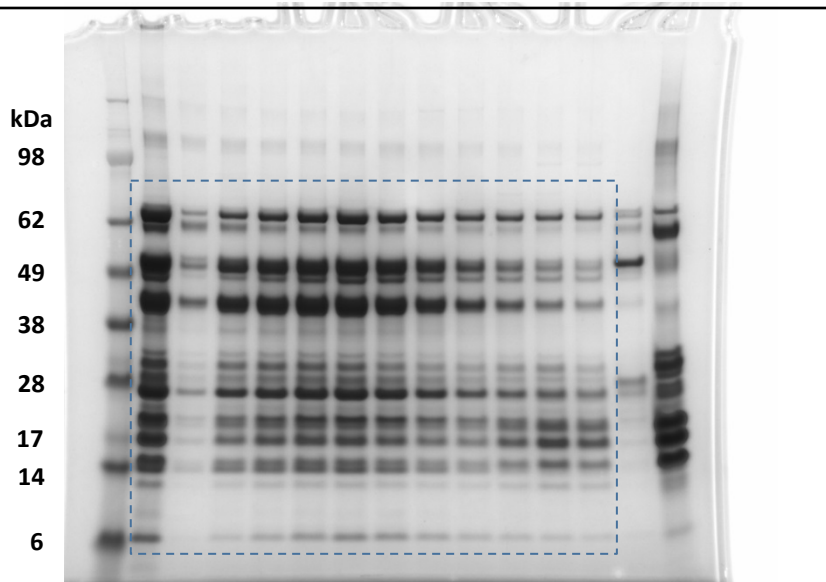

**Extended Data Figure 8f**

SDS PAGE Coomassie blue staining

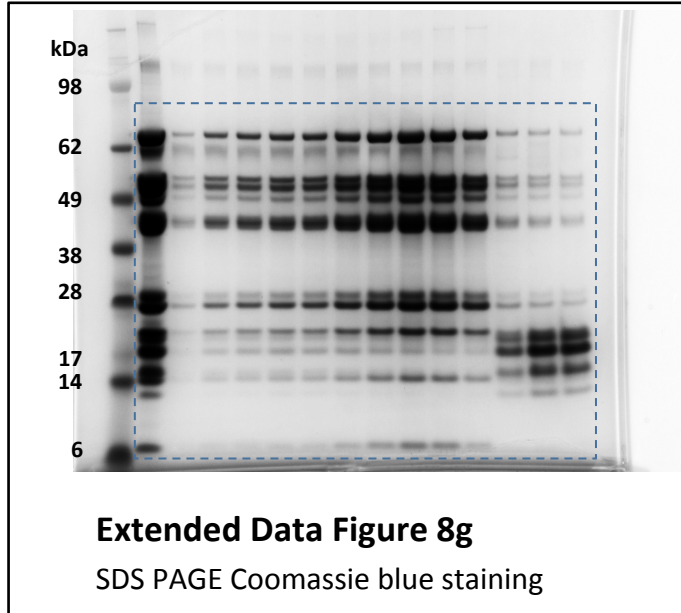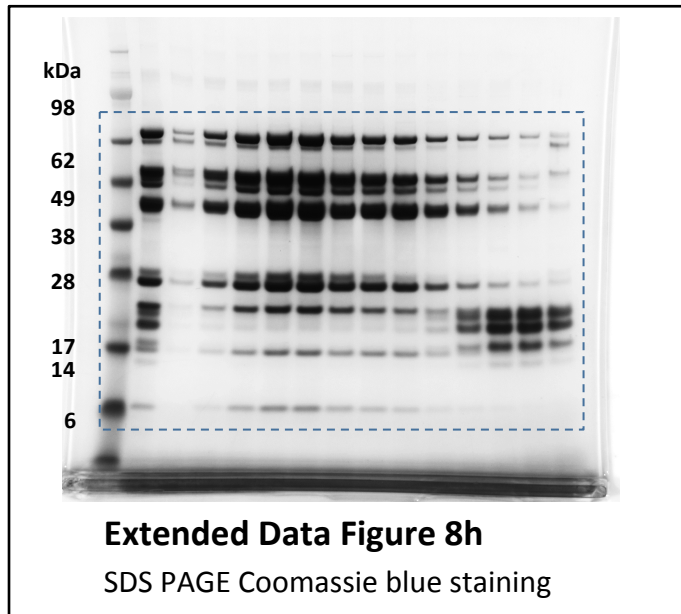

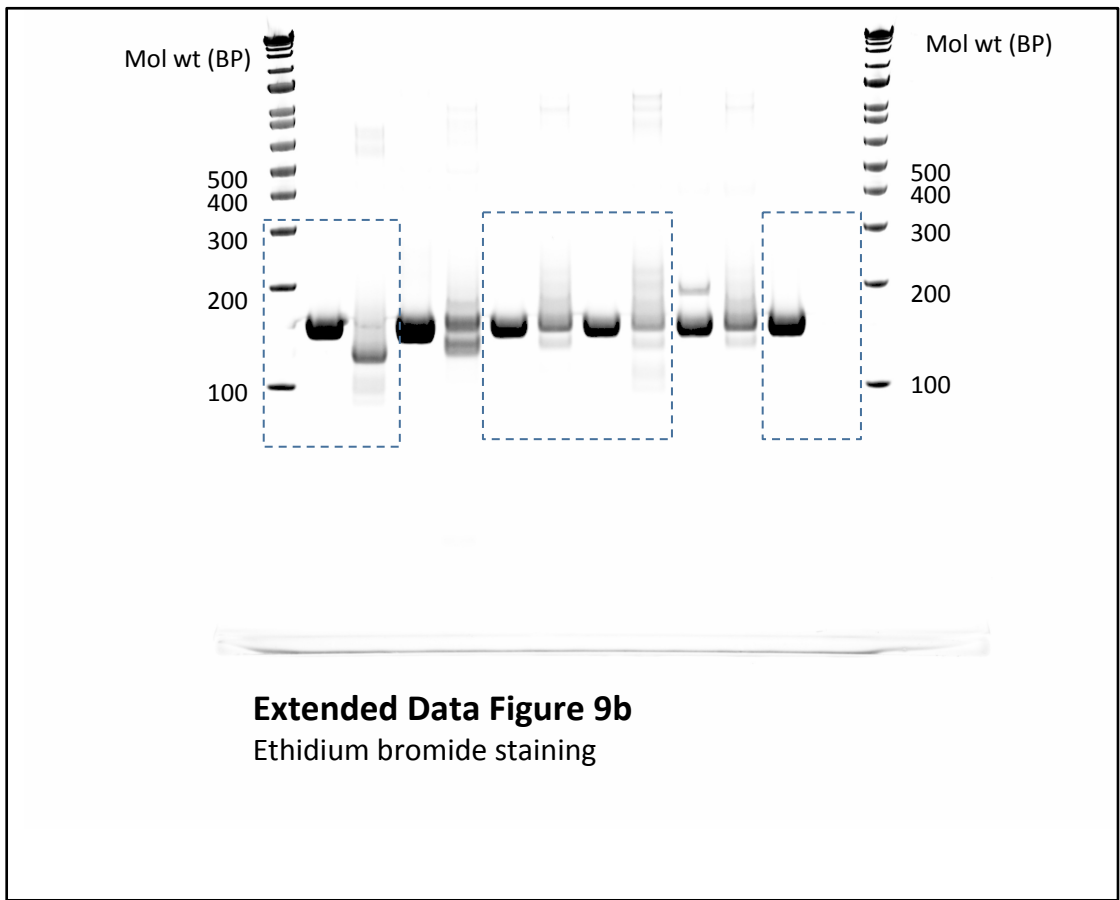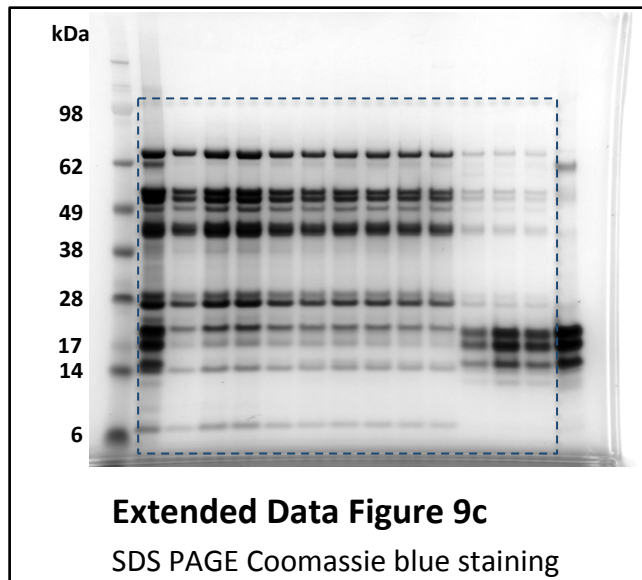

**Supplementary Figure 1. Source data gels.**

Original source images for all data obtained by electrophoretic separation: Coomassie blue stained and ethidium bromide stained SDS PAGE and western blots and ethidium bromide stained agarose gel.
